# Supplementary material for: A Sec14-like phosphatidylinositol transfer protein paralog defines a novel class of heme-binding proteins
Source: eLife journal article supplement (doi:10.7554/elife.57081), 2020-08-11
Supplement: supp [file elife-57081-supp-v1.zip]

Archive with 10 entries (10 files):
- elife_poa_e57081_Figure_1_figure_supplement_1.pdf
- elife_poa_e57081_Figure_2_figure_supplement_1.pdf
- elife_poa_e57081_Figure_3_figure_supplement_1.pdf
- elife_poa_e57081_Figure_5_figure_supplement_1.pdf
- elife_poa_e57081_Figure_6_figure_supplement_1.pdf
- elife_poa_e57081_Figure_7_figure_supplement_1.pdf
- elife_poa_e57081_Figure_8_figure_supplement_1.pdf
- elife_poa_e57081_Figure_8_figure_supplement_2.pdf
- elife_poa_e57081_Supplementary_file_1.docx
- elife_poa_e57081_Transparent_Reporting_File.docx
