# Supplementary material for: A Sec14-like phosphatidylinositol transfer protein paralog defines a novel class of heme-binding proteins
Source: eLife journal article supplement (doi:10.7554/elife.57081), 2020-08-11

# Figure 3 -- figure supplement 1

## *S\_cerevisiae\_Sfh5*

*S\_cerevisiae\_Sfh5*  
*C\_glabrata\_Sfh5*  
*C\_albicans\_Sfh5*  
*C\_tropicalis\_CTRG\_03339*  
*C\_auris\_B9J08\_004048*  
*A\_nidulans\_An8233*  
*A\_oryzae\_Ao090102000579*  
*N\_crassa\_NCU02200*  
*C\_neoformans\_CNE04320*  
*Y\_lipolytica\_YALI0\_D08866g*

## *S\_cerevisiae\_Sfh5*

*S\_cerevisiae\_Sfh5*  
*C\_glabrata\_Sfh5*  
*C\_albicans\_Sfh5*  
*C\_tropicalis\_CTRG\_03339*  
*C\_auris\_B9J08\_004048*  
*A\_nidulans\_An8233*  
*A\_oryzae\_Ao090102000579*  
*N\_crassa\_NCU02200*  
*C\_neoformans\_CNE04320*  
*Y\_lipolytica\_YALI0\_D08866g*

## *S\_cerevisiae\_Sfh5*

*S\_cerevisiae\_Sfh5*  
*C\_glabrata\_Sfh5*  
*C\_albicans\_Sfh5*  
*C\_tropicalis\_CTRG\_03339*  
*C\_auris\_B9J08\_004048*  
*A\_nidulans\_An8233*  
*A\_oryzae\_Ao090102000579*  
*N\_crassa\_NCU02200*  
*C\_neoformans\_CNE04320*  
*Y\_lipolytica\_YALI0\_D08866g*

## *S\_cerevisiae\_Sfh5*

*S\_cerevisiae\_Sfh5*  
*C\_glabrata\_Sfh5*  
*C\_albicans\_Sfh5*  
*C\_tropicalis\_CTRG\_03339*  
*C\_auris\_B9J08\_004048*  
*A\_nidulans\_An8233*  
*A\_oryzae\_Ao090102000579*  
*N\_crassa\_NCU02200*  
*C\_neoformans\_CNE04320*  
*Y\_lipolytica\_YALI0\_D08866g*

## *S\_cerevisiae\_Sfh5*

*S\_cerevisiae\_Sfh5*  
*C\_glabrata\_Sfh5*  
*C\_albicans\_Sfh5*  
*C\_tropicalis\_CTRG\_03339*  
*C\_auris\_B9J08\_004048*  
*A\_nidulans\_An8233*  
*A\_oryzae\_Ao090102000579*  
*N\_crassa\_NCU02200*  
*C\_neoformans\_CNE04320*  
*Y\_lipolytica\_YALI0\_D08866g*

# Figure 3 -- figure supplement 1 (....continued)

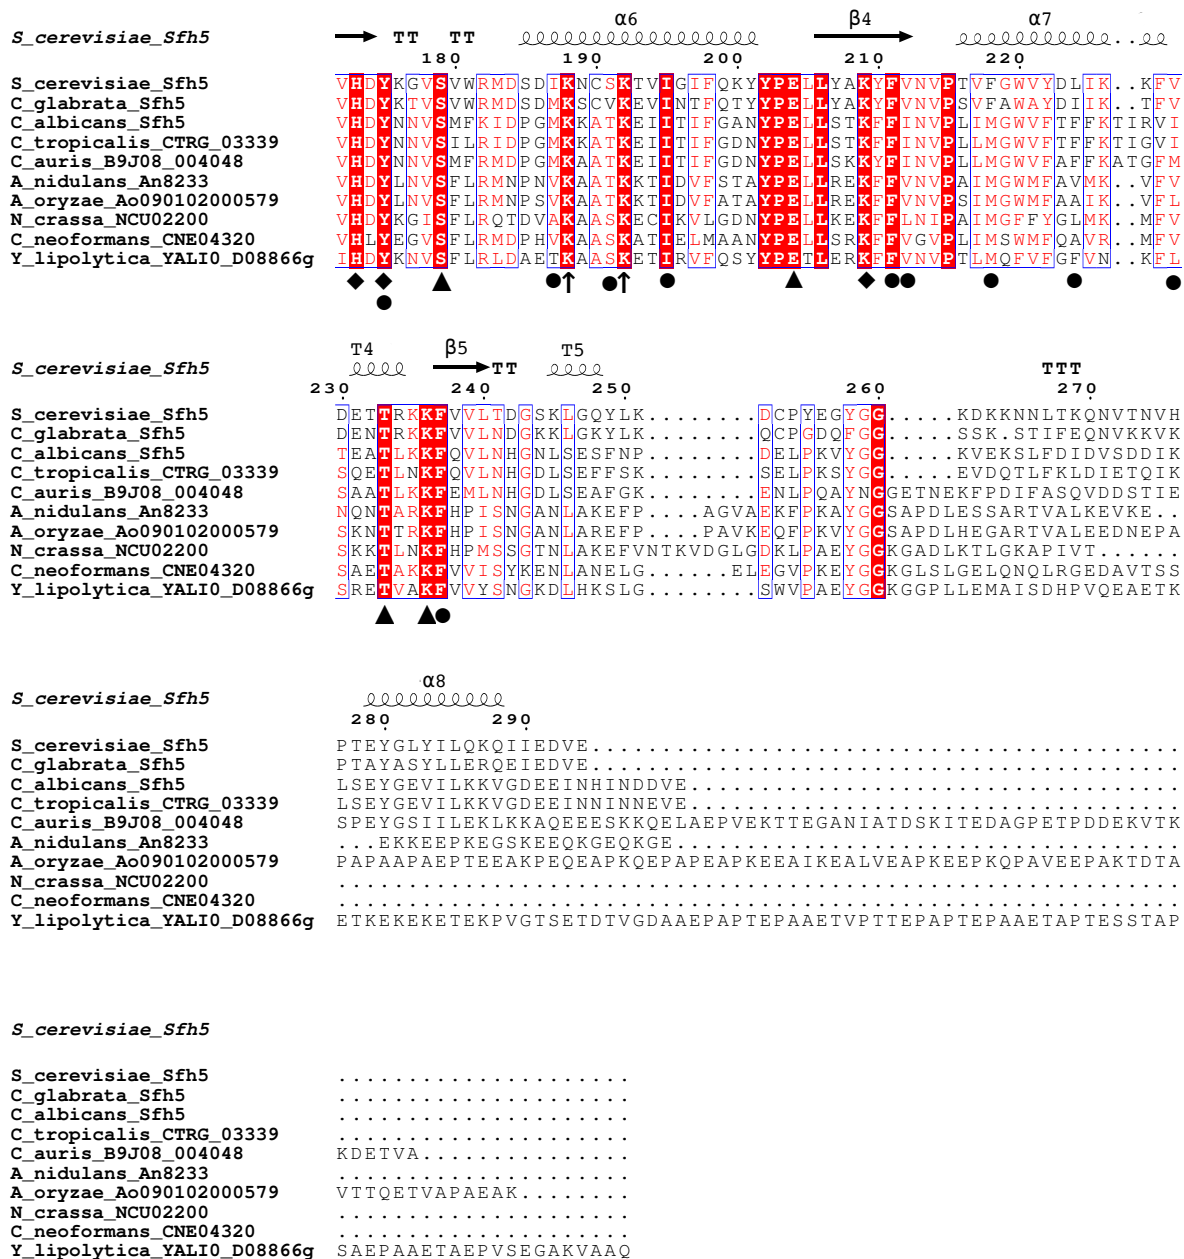

Supplement: supp [file elife-57081-supp-v1.zip › elife_poa_e57081_Figure_3_figure_supplement_1.pdf]
