# Supplementary material for: A Sec14-like phosphatidylinositol transfer protein paralog defines a novel class of heme-binding proteins
Source: eLife journal article supplement (doi:10.7554/elife.57081), 2020-08-11
Supplement: supp [file elife-57081-supp-v1.zip › elife_poa_e57081_Supplementary_file_1.docx]

**SUPPLEMENTARY MATERIALS**

**A Sec14-like Phosphatidylinositol Transfer Protein Paralog Defines a Novel Class of Heme-binding Proteins**

**Danish Khan1, Dongju Lee2, Gulcin Gulten1, Anup Aggarwal1, Joshua Wofford3,4, Inna Krieger1, Ashutosh Tripathi2, John W. Patrick3, Debra M. Eckert5, Arthur Laganowsky3, James Sacchettini1, Paul Lindahl1,2, Vytas A. Bankaitis1,2,3***

**1Department of Biochemistry & Biophysics**

**Texas A&M University**

**College Station, Texas 77843-2128, USA**

**2Department of Molecular and Cellular Medicine**

**Texas A&M Health Sciences Center**

**College Station, Texas 77843-1114, USA**

**3Department of Chemistry**

**Texas A&M University**

**College Station, Texas 77843-2128**

**4Department of Chemistry**

**Charleston Southern University**

**North Charleston, South Carolina 29406**

**5Dept of Biochemistry**

**University of Utah School of Medicine**

**Salt Lake City, UT 84112**

**SUPPLEMENTARY TABLES**

**Supplementary Table 1.**

**Soret Sfh5 Residue Heme Content**

**Protein Maximum 173,175 Pair % Total Protein Bound**

**Sfh5 404 nm H,Y 29.7*/34.7#**

**H173A 403 nm A,Y 12.0*/21.0#**

**H173Y 402 nm Y,Y 37.0***

**Y175A n.d. H,A 0.48***

**Y175F n.d. H,F n.d*/0.01#**

**Y175H 407 nm H,H 11.6***

**Y175F,Y68A 413 nm H,F 2.0***

Soret peak maxima and heme content of wild-type and various mutant proteins as determined by pyridine hemochromagen assay (*) or ICP-MS (#). Not detectable (n.d.).

**Supplementary Table 2.**

**Protein Activity (units/mg)**

**Horseradish Peroxidase 1150.0**

**Sfh5 5.2**

**Sfh5Y175H 20.2**

**Sfh5H173Y 1.9**

Peroxidase activity measurements for Sfh5 and mutant proteins. A unit of peroxidase activity is defined as that amount of activity that produces 1 mg of purpurogallin in a 20 sec incubation at pH 7.0 at room temperature. Activities were normalized to protein heme content as determined by ICP-MS and pyridine hemochromagen assays.

**Supplementary Table 3.**

**Fe3+LA (large A) Fe3+SA (small A) Fe2+**

**Spin 5/2 5/2 2**

**mm/s 0.40 0.37 0.57**

**EQ mm/s 0.55 0.91 1.73**

**D (cm-1) 2.5 2.0 ---**

**E/D 0.072 0.067 ---**

**Ax/gnnkG -57 -121 ---**

**Ay/gnnkG -171 -58 ---**

**Az/gnnkG -216 -14 ---**

**η 0.83 0.0 ---**

**Г (mm/s) 0.48 0.45 0.37**

Mössbauer parameters used in fitting the Sfh5 and Sfh5H173A spectra are identified. Instruments were calibrated using an α-Fe foil at room temperature. Approximately 800 µl of recombinant proteins (concentration = 1.5 mM) were collected in a Mössbauer cup, frozen over liquid nitrogen and stored at -80°C until use.
