# Supplementary figures and images for: A Sec14-like phosphatidylinositol transfer protein paralog defines a novel class of heme-binding proteins
Source: eLife journal article supplement (doi:10.7554/elife.57081), 2020-08-11

Figure 1 -- figure supplement 1

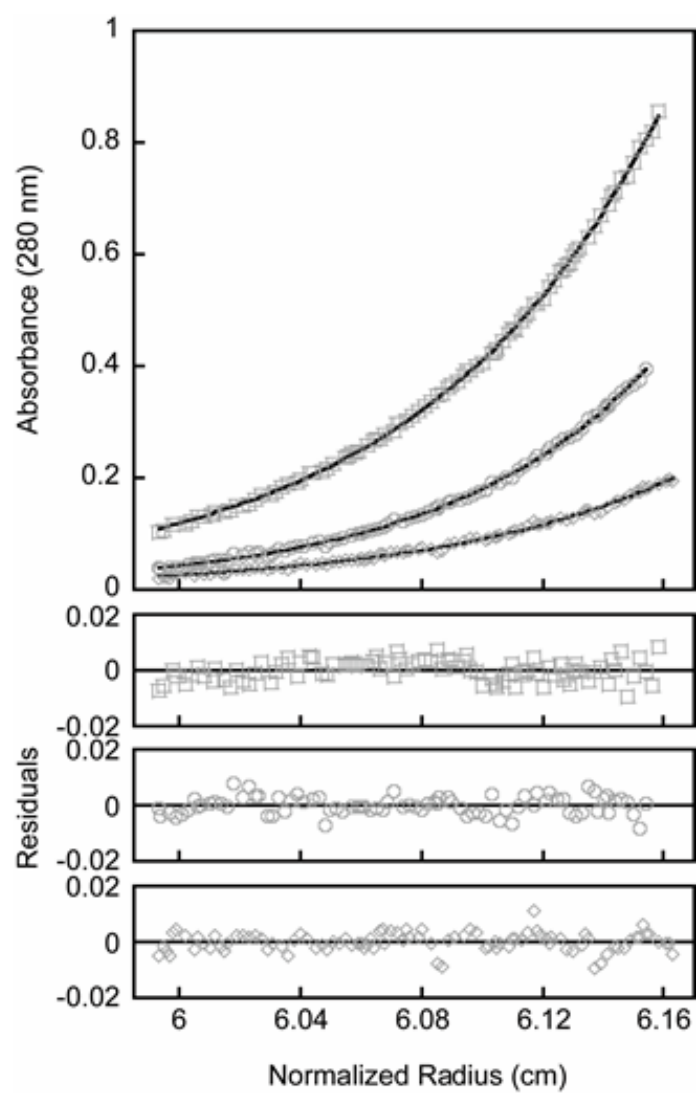

Supplement: supp [file elife-57081-supp-v1.zip › elife_poa_e57081_Figure_1_figure_supplement_1.pdf]

Figure 2 -- figure supplement 1

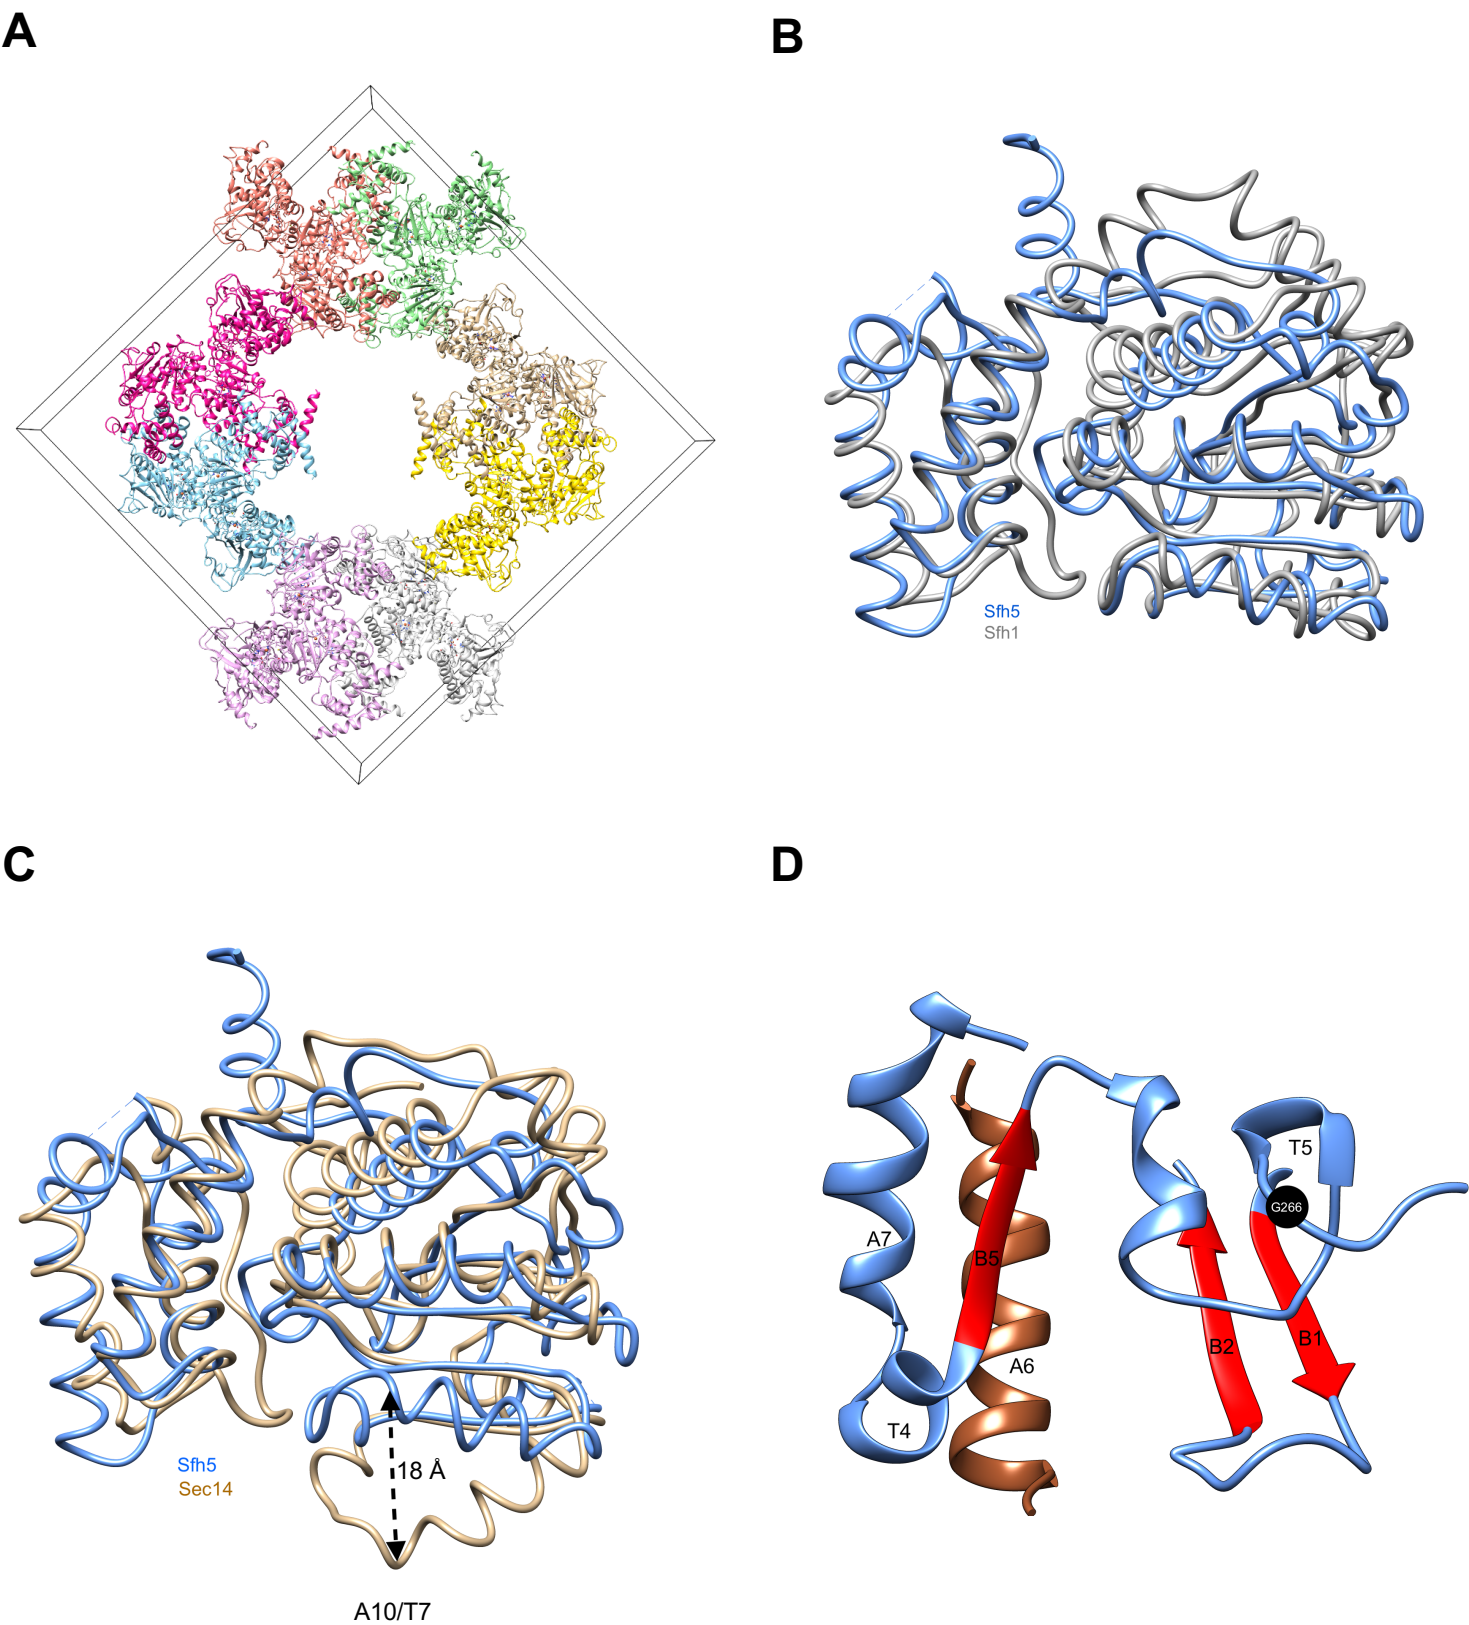

Supplement: supp [file elife-57081-supp-v1.zip › elife_poa_e57081_Figure_2_figure_supplement_1.pdf]

**Figure 5 -- figure supplement 1**

**A**

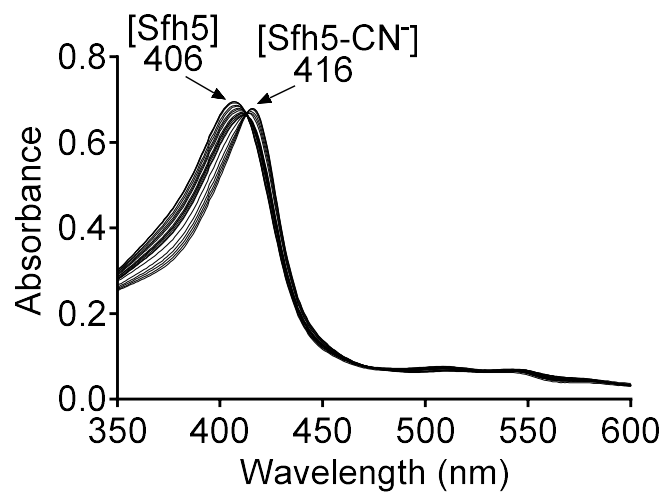

**B**

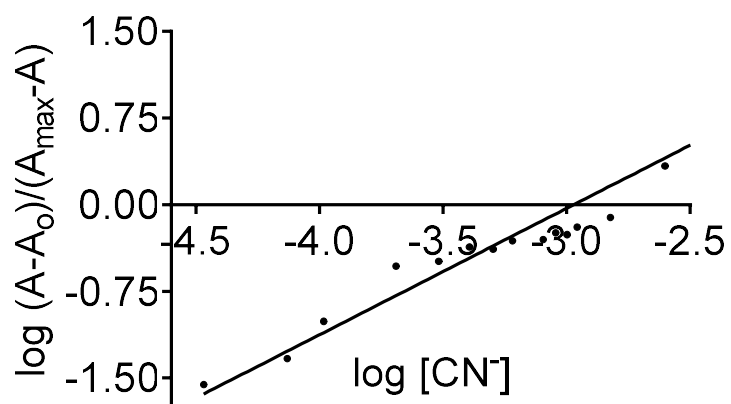

Supplement: supp [file elife-57081-supp-v1.zip › elife_poa_e57081_Figure_5_figure_supplement_1.pdf]

Figure 6 -- figure supplement 1

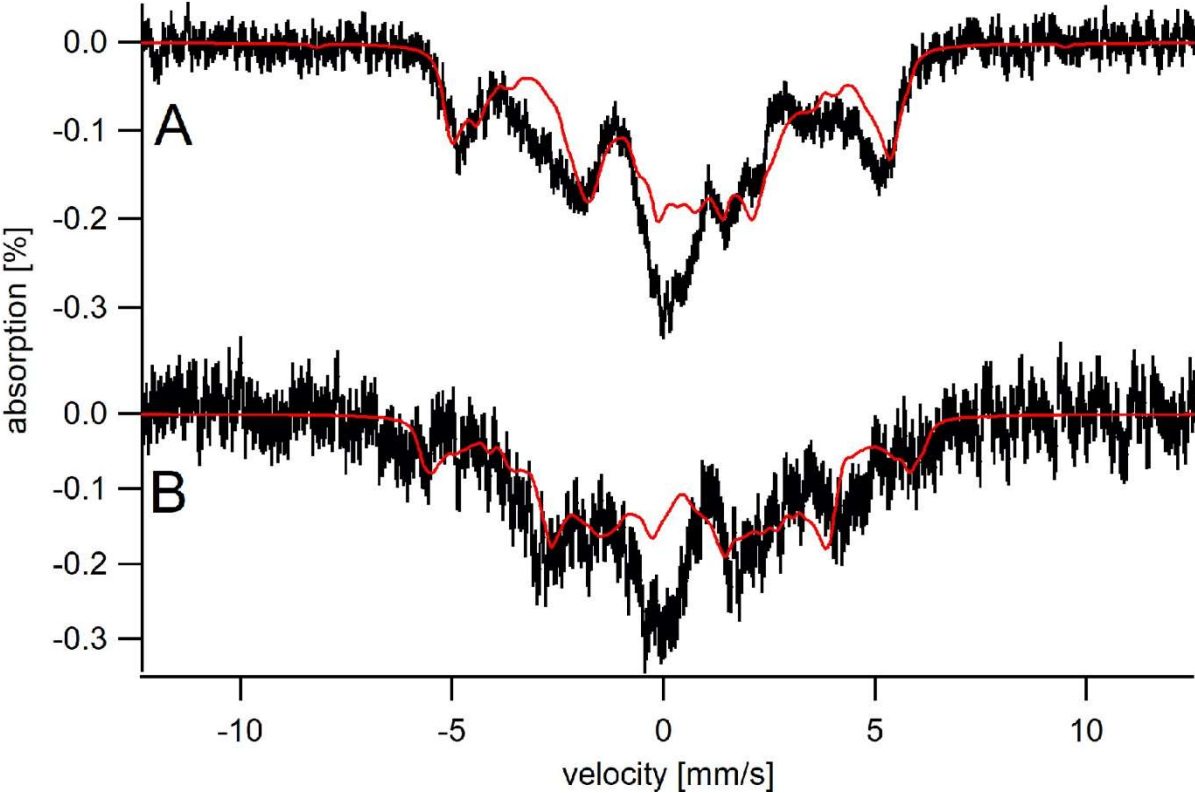

Supplement: supp [file elife-57081-supp-v1.zip › elife_poa_e57081_Figure_6_figure_supplement_1.pdf]

Figure 7 -- figure supplement 1

A

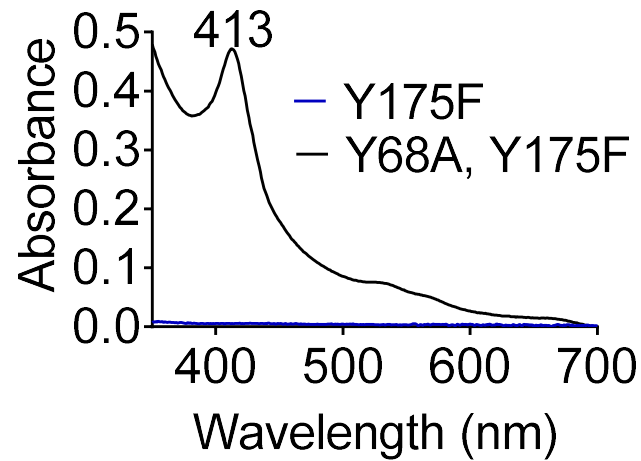

B

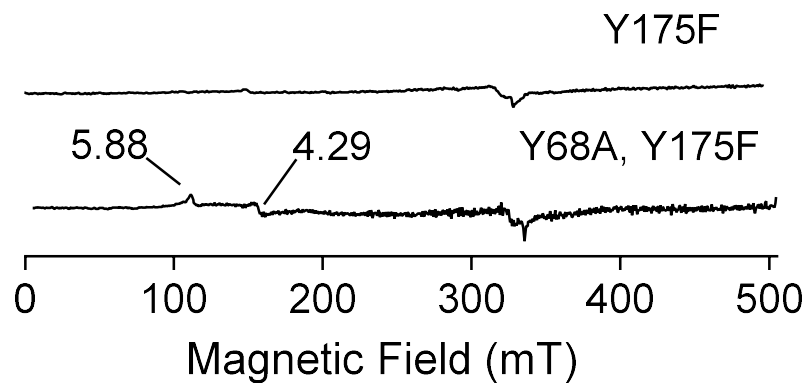

Supplement: supp [file elife-57081-supp-v1.zip › elife_poa_e57081_Figure_7_figure_supplement_1.pdf]

Figure 8 -- figure supplement 1

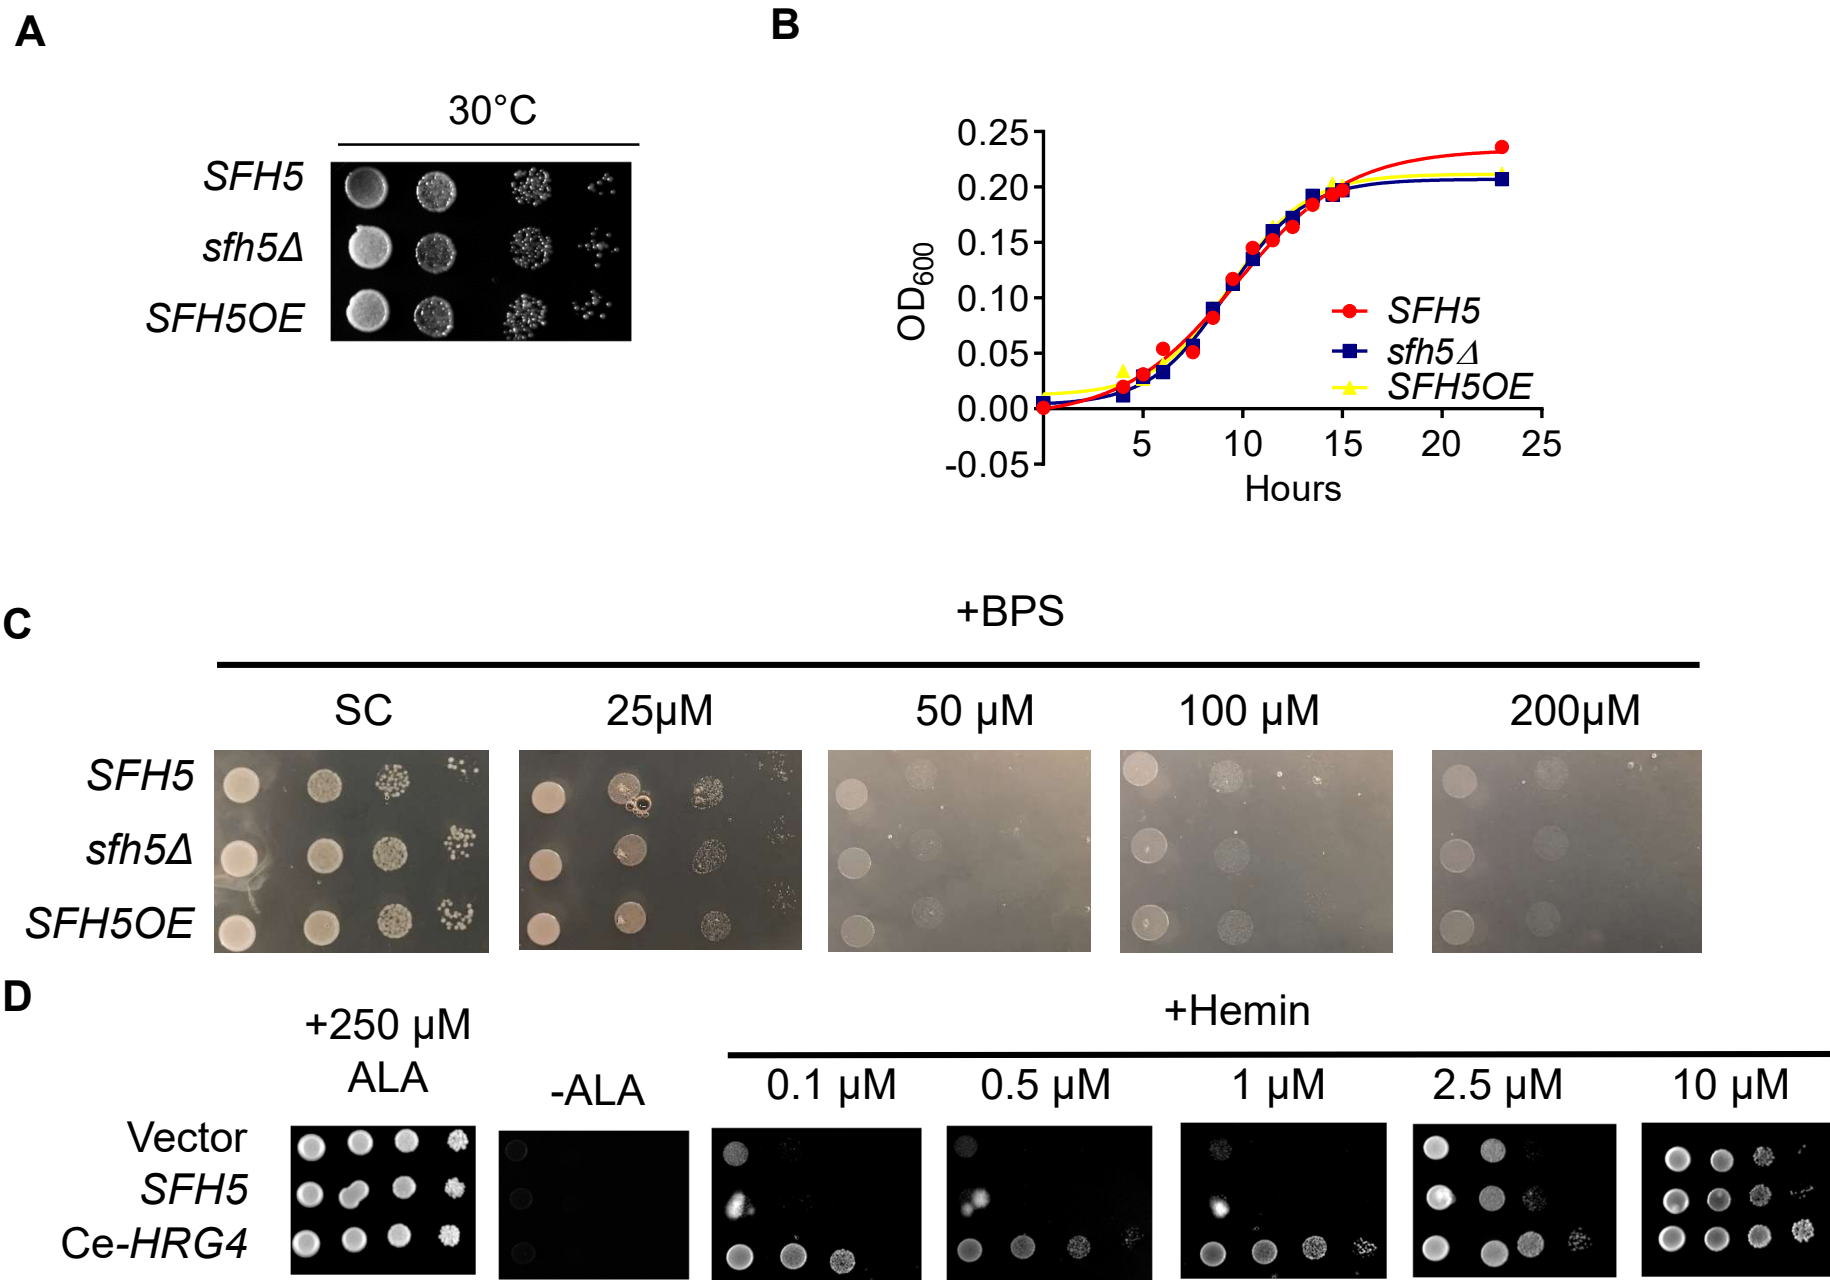

Supplement: supp [file elife-57081-supp-v1.zip › elife_poa_e57081_Figure_8_figure_supplement_1.pdf]

Figure 8 -- figure supplement 2

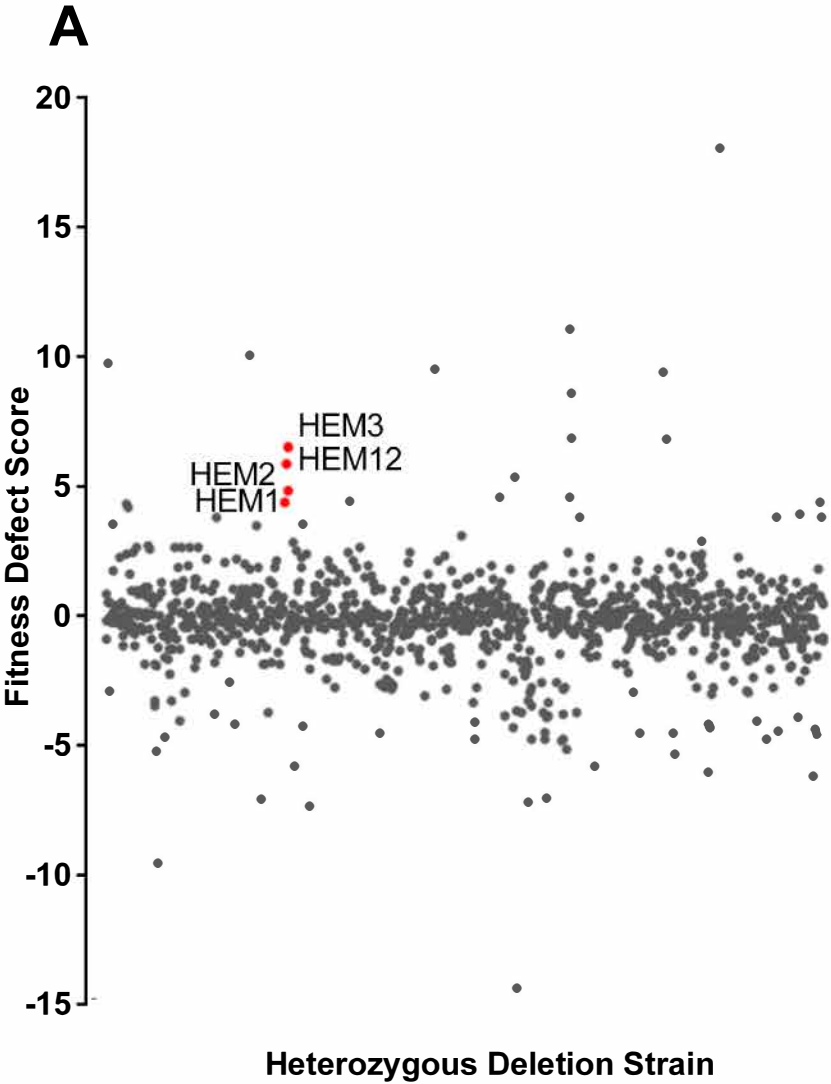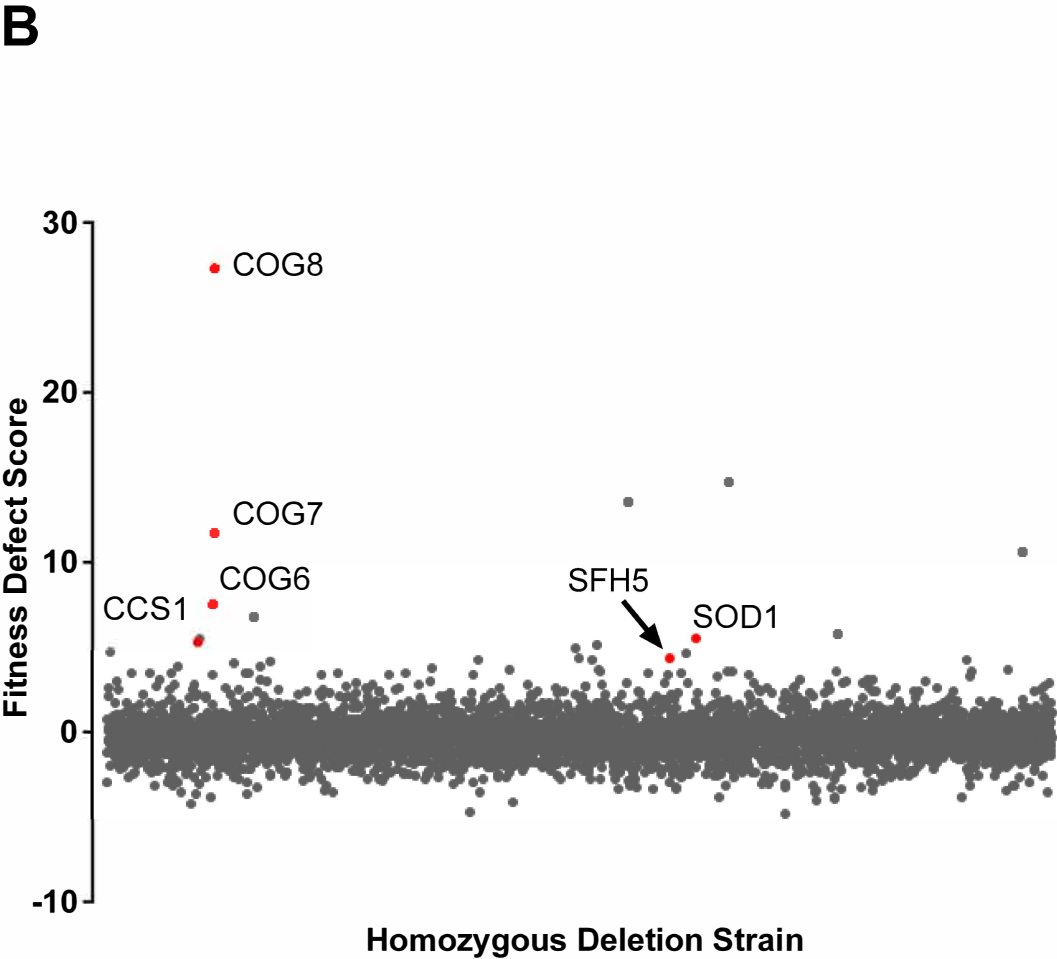

Supplement: supp [file elife-57081-supp-v1.zip › elife_poa_e57081_Figure_8_figure_supplement_2.pdf]
